# Supplementary material
Source: PubMed Central journal article supplement (PMC3338267)
Supplement: supp_112.138727_FigureS1.pdf [file supp_112.138727_FigureS1.pdf]

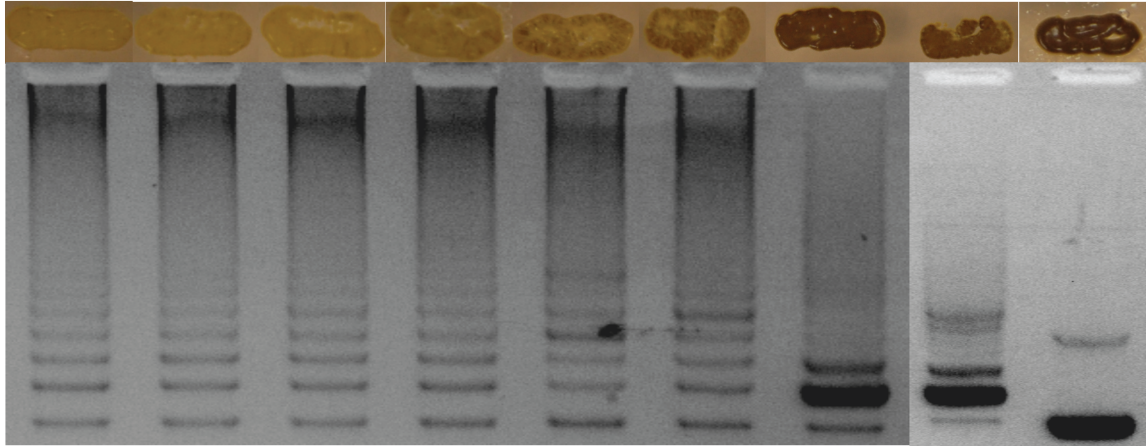

**Figure S1** The PCR pattern of repeats is correlated with mating-type switching efficiency. The upper panel shows iodine-stained patches originating from independent colonies. The lower panel shows the PCR band pattern of those colonies amplified with *mat1P* internal forward (CACTAAACCCCACTTGATGCG) and H1 flanking reverse (GAGTATATTATGGTAGGGAGTGCCTAGCG) primers. The procedure used is described in legend to Figure 1D.
