# Supplementary material
Source: PubMed Central journal article supplement (PMC3338267)
Supplement: supp_112.138727_TableS1.pdf [file supp_112.138727_TableS1.pdf]

**Table S1 Fission yeast stains**

| Stain  | Genotype                                                                           | Reference            |
|--------|------------------------------------------------------------------------------------|----------------------|
| CY37   | <i>h<sup>90</sup> mat1-rin1 leu1.32 ade6.216 swi3-S146</i>                         | This study           |
| CY39   | <i>h<sup>90</sup> mat1-rin1 ade6.210 swi3-S146</i>                                 | This study           |
| CY83   | <i>h<sup>90</sup> mat1::ura4<sup>+</sup> leu1.32 ura4.D18 ade6.210</i>             | This study           |
| CY84   | <i>h<sup>90</sup> mat1::128 bp-dup::ura4<sup>+</sup> leu1.32 ura4.D18 ade6.210</i> | This study           |
| CY96   | <i>h<sup>90</sup> mat1::134 bp-dup::ura4<sup>+</sup> leu1.32 ura4.D18 ade6.210</i> | This study           |
| CY177  | <i>h<sup>90</sup> mat1-rin1 ura4.D18 ade6.216or706 Δrhp51::ura4<sup>+</sup></i>    | This study           |
| CY178  | <i>h<sup>90</sup> mat1-rin1 ura4.D18 ade6.216or706 Δrhp51::ura4<sup>+</sup></i>    | This study           |
| SP976  | <i>h<sup>90</sup> leu1-32, ura4-D18, ade6-210</i>                                  | (THON and KLAR 1993) |
| SP2533 | <i>h<sup>90</sup> leu1.32 ura4.D18 ade6.210</i>                                    | This study           |
| SP2579 | <i>h<sup>90</sup> mat1-rin1 leu1.32 ura4.D18 ade6.216</i>                          | This study           |
